# Supplementary material for: Neuropeptide Y Overexpressing Female and Male Mice Show Divergent Metabolic but Not Gut Microbial Responses to Prenatal Metformin Exposure
Source: PubMed Central journal article supplement (PMC5040270; doi:10.1371/journal.pone.0163805), 2016-09-28
Supplement: pone.0163805.s004.pdf [file pone.0163805.s004.pdf]

**S4 Table. Predicted pathways by PICRUST in the VEH exposed vs. MET exposed OE-NPY<sup>DβH</sup> male offspring.**

|                                                                                                                      | <b>P-value<br/>(unadjusted)</b> | <b>FDR<br/>(adjusted P-value)</b> |
|----------------------------------------------------------------------------------------------------------------------|---------------------------------|-----------------------------------|
| <b>Unclassified; Metabolism; Carbohydrate metabolism</b>                                                             | 0.052                           | 0.764                             |
| <b>Unclassified; Metabolism; Glycan biosynthesis and metabolism</b>                                                  | 0.052                           | 0.764                             |
| <b>Unclassified; Metabolism; Nucleotide metabolism</b>                                                               | 0.052                           | 0.764                             |
| <b>Metabolism; Carbohydrate Metabolism; Pentose and glucuronate interconversions</b>                                 | 0.052                           | 0.764                             |
| <b>Unclassified; Genetic Information Processing; Translation proteins</b>                                            | 0.052                           | 0.764                             |
| <b>Human Diseases; Infectious Diseases; African trypanosomiasis</b>                                                  | 0.055                           | 0.764                             |
| <b>Metabolism; Metabolism of Terpenoids and Polyketides; Biosynthesis of siderophore group nonribosomal peptides</b> | 0.082                           | 0.764                             |
| <b>Metabolism; Xenobiotics Biodegradation and Metabolism; Bisphenol degradation</b>                                  | 0.082                           | 0.764                             |
| <b>Metabolism; Biosynthesis of Other Secondary Metabolites; Flavone and flavonol biosynthesis</b>                    | 0.082                           | 0.764                             |
| <b>Metabolism; Carbohydrate Metabolism; Pentose phosphate pathway</b>                                                | 0.082                           | 0.764                             |
| <b>Genetic Information Processing; Translation; Ribosome Biogenesis</b>                                              | 0.082                           | 0.764                             |
| <b>Metabolism; Lipid Metabolism; Steroid hormone biosynthesis</b>                                                    | 0.082                           | 0.764                             |
| <b>Unclassified; Genetic Information Processing; Transcription related proteins</b>                                  | 0.082                           | 0.764                             |
| <b>Metabolism; Amino Acid Metabolism; Valine, leucine and isoleucine biosynthesis</b>                                | 0.082                           | 0.764                             |

$n(\text{VEH OE-NPY}^{\text{D}\beta\text{H}}) = 5$ ,  $n(\text{MET OE-NPY}^{\text{D}\beta\text{H}}) = 6$ . Unadjusted P-value by Mann-Whitney U-test.
